# Supplementary material for: Spontaneous resolution of two homochiral ferroelectric cadmium(ii) frameworks and an achiral framework from a one-pot reaction involving achiral rigid ligands
Source: Royal Society of Chemistry journal article supplement (doi:10.1039/c0ce00054j), 2010-01-01
Supplement: c0ce00054j.pdf [file c0ce00054j.pdf]

## Supporting Information

# Spontaneous Resolution of Two Homochiral Ferroelectric Cadmium(II) Frameworks and an Achiral Framework from an One-pot Reaction Involving Achiral Rigid Ligands

Zhi Su, Man-Sheng Chen, Jian Fan, Min Chen, Shui-Sheng Chen, Li Luo, Wei-Yin Sun\*

*Coordination Chemistry Institute, State Key Laboratory of Coordination Chemistry, School of Chemistry and Chemical Engineering, Nanjing National Laboratory of Microstructures, Nanjing University, Nanjing 210093, China. E-mail: [sunwy@nju.edu.cn](mailto:sunwy@nju.edu.cn); Fax: +86 25 8331 4502*

**Table S1.** Selected Bond Lengths (Å) and Bond Angles (°) for Complex **1 - 2**

| <b>Complex 1L<sup>a</sup></b> |            |               |            |
|-------------------------------|------------|---------------|------------|
| Cd1-N1                        | 2.272(5)   | Cd1-N5#2      | 2.440(5)   |
| Cd1-N3#1                      | 2.278(4)   | Cd1-O1        | 2.308(4)   |
| Cd1-O2                        | 2.612(5)   | Cd1-O3#3      | 2.504(5)   |
| Cd1-O4#3                      | 2.447(5)   |               |            |
| O1-Cd1-O2                     | 52.19(14)  | O2-Cd1-N3#1   | 82.34(15)  |
| O1-Cd1-N1                     | 97.00(17)  | O2-Cd1-O3#3   | 159.05(16) |
| O1-Cd1-N5#2                   | 79.23(17)  | O2-Cd1-O4#3   | 141.95(16) |
| O1-Cd1-N3#1                   | 133.89(16) | N1-Cd1-N5#2   | 167.92(17) |
| O1-Cd1-O3#3                   | 136.38(16) | N1-Cd1-N3#1   | 95.60(17)  |
| O1-Cd1-O4#3                   | 89.76(16)  | O3#3-Cd1-N1   | 100.07(17) |
| O2-Cd1-N1                     | 96.92(16)  | O4#3-Cd1-N1   | 86.61(16)  |
| O2-Cd1-N5#2                   | 89.83(16)  | N3#1-Cd1-N5#2 | 95.22(17)  |
| O3#3-Cd1-N3#1                 | 83.89(16)  | O3#3-Cd1-N5#2 | 75.78(17)  |
| O4#3-Cd1-N3#1                 | 135.21(16) | O4#3-Cd1-N5#2 | 81.93(16)  |
| O3#3-Cd1-O4#3                 | 51.92(16)  |               |            |

---

**Complex 1R<sup>b</sup>**

|               |            |               |            |
|---------------|------------|---------------|------------|
| Cd1-N1        | 2.275(3)   | Cd1-N5#2      | 2.444(4)   |
| Cd1-N3#1      | 2.280(4)   | Cd1-O1        | 2.311(3)   |
| Cd1-O2        | 2.621(4)   | Cd1-O3#3      | 2.507(4)   |
| Cd1-O4#3      | 2.434(3)   |               |            |
| O1-Cd1-O2     | 52.39(11)  | O2-Cd1-N3#1   | 82.13(12)  |
| O1-Cd1-N1     | 96.68(12)  | O2-Cd1-O3#3   | 158.93(12) |
| O1-Cd1-N5#2   | 79.62(12)  | O2-Cd1-O4#3   | 142.06(12) |
| O1-Cd1-N3#1   | 133.86(12) | N1-Cd1-N5#2   | 168.31(12) |
| O1-Cd1-O3#3   | 136.69(12) | N1-Cd1-N3#1   | 95.66(13)  |
| O1-Cd1-O4#3   | 89.67(12)  | O3#3-Cd1-N1   | 100.32(12) |
| O2-Cd1-N1     | 96.48(12)  | O4#3-Cd1-N1   | 86.83(12)  |
| O2-Cd1-N5#2   | 90.03(12)  | N3#1-Cd1-N5#2 | 94.84(13)  |
| O3#3-Cd1-N3#1 | 83.64(12)  | O3#3-Cd1-N5#2 | 75.75(13)  |
| O4#3-Cd1-N3#1 | 135.32(13) | O4#3-Cd1-N5#2 | 82.09(12)  |
| O3#3-Cd1-O4#3 | 52.25(12)  |               |            |

**Complex 2<sup>c</sup>**

|               |            |             |            |
|---------------|------------|-------------|------------|
| Cd1-O1W       | 2.237(3)   | Cd2-N3      | 2.262(4)   |
| Cd1-O7#3      | 2.256(4)   | Cd2-N1#1    | 2.263(3)   |
| Cd1-N5#2      | 2.295(4)   | Cd2-O1      | 2.318(3)   |
| Cd1-O3        | 2.310(4)   | Cd2-O6      | 2.380(3)   |
| Cd1-O4        | 2.355(3)   | Cd2-O2      | 2.384(3)   |
| Cd1-O8#3      | 2.535(3)   | Cd2-O5      | 2.404(3)   |
| O1W-Cd1-O7#3  | 124.21(14) | N3-Cd2-N1#1 | 101.81(13) |
| O1W-Cd1-N5#2  | 102.01(13) | N3-Cd2-O1   | 98.18(12)  |
| O7#3-Cd1-N5#2 | 89.32(14)  | N1#1-Cd2-O1 | 127.33(13) |
| O1W-Cd1-O3    | 121.36(14) | N3-Cd2-O6   | 109.56(12) |
| O7#3-Cd1-O3   | 114.12(16) | N1#1-Cd2-O6 | 86.85(12)  |
| N5#2-Cd1-O3   | 83.22(13)  | O1-Cd2-O6   | 130.33(11) |
| O1W-Cd1-O4    | 92.34(13)  | N3-Cd2-O2   | 150.91(12) |
| O7#3-Cd1-O4   | 115.26(15) | N1#1-Cd2-O2 | 87.50(12)  |
| N5#2-Cd1-O4   | 137.33(13) | O1-Cd2-O2   | 55.78(11)  |
| O3-Cd1-O4     | 55.46(12)  | O6-Cd2-O2   | 98.32(11)  |
| O1W-Cd1-O8#3  | 84.83(12)  | N3-Cd2-O5   | 92.15(12)  |
| O7#3-Cd1-O8#3 | 53.92(12)  | N1#1-Cd2-O5 | 141.56(12) |
| N5#2-Cd1-O8#3 | 136.52(13) | O1-Cd2-O5   | 84.79(11)  |
| O3-Cd1-O8#3   | 129.73(13) | O6-Cd2-O5   | 54.71(10)  |
| O4-Cd1-O8#3   | 84.16(12)  | O2-Cd2-O5   | 97.45(11)  |

---

<sup>a</sup>Symmetry transformations used to generate equivalent atoms: #1 1-y, 1+x, -1/4+z; #2 1+x, 1+y, z; #3 y, 3-x, 1/4+z. <sup>b</sup>Symmetry transformations used to generate equivalent atoms: #1 3+y, 1-x, -1/4+z; #2 1+x, 1+y, z; #3 2-y, -2+x, 1/4+z. <sup>c</sup>Symmetry transformations used to generate equivalent atoms: #1 x, -1+y, z; #2 1+x, -1+y, 1+z; #3 2+x, -1+y, z.

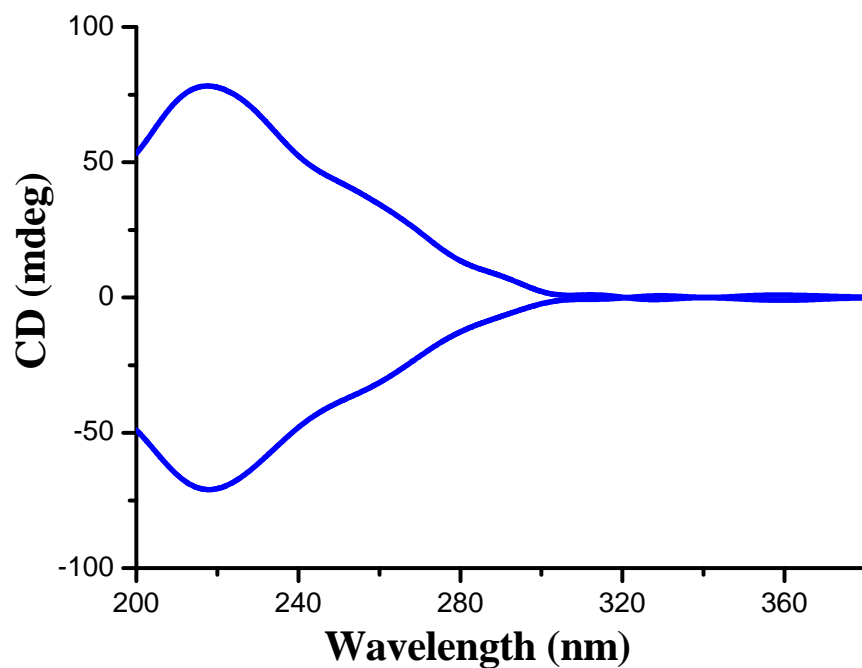

**Figure S1.** Solid-state CD spectra of complex **1** (KBr pellet).

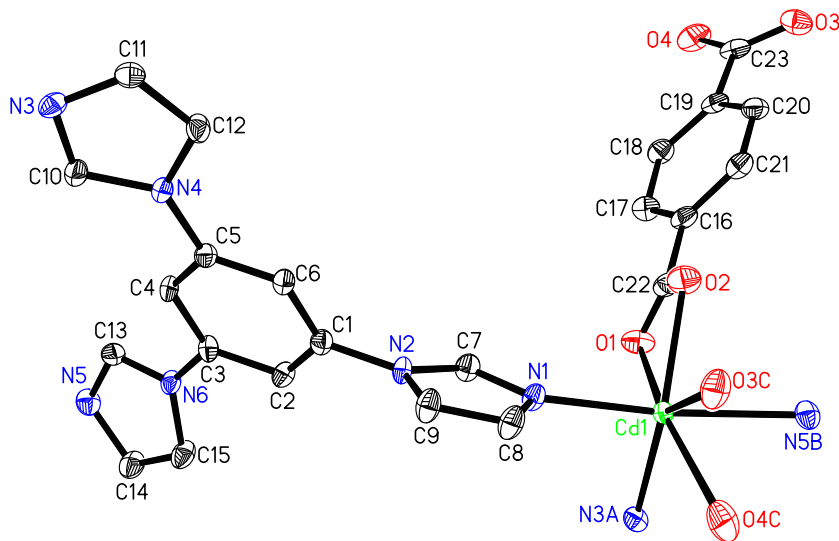

**Figure S2.** The asymmetric unit of complex **1L** with the ellipsoids drawn at the 30 % probability level. The hydrogen atoms and free water molecules are omitted for clarity.

Symmetry code: A, 1-y, 1+x, -1/4+z; B, 1+x, 1+y, z; C, y, 3-x, 1/4+z.

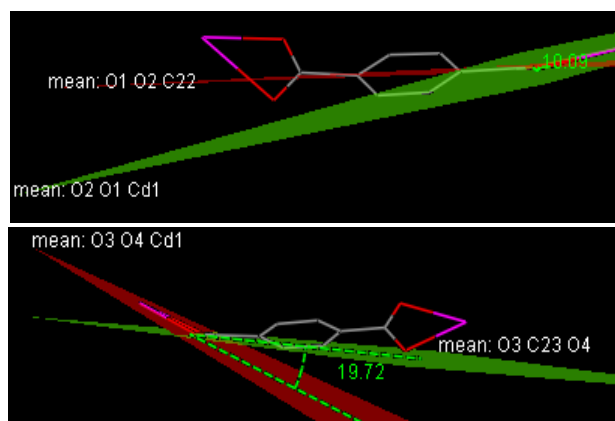

**Figure S3.** The distortion of BDC<sup>2-</sup> in 1.

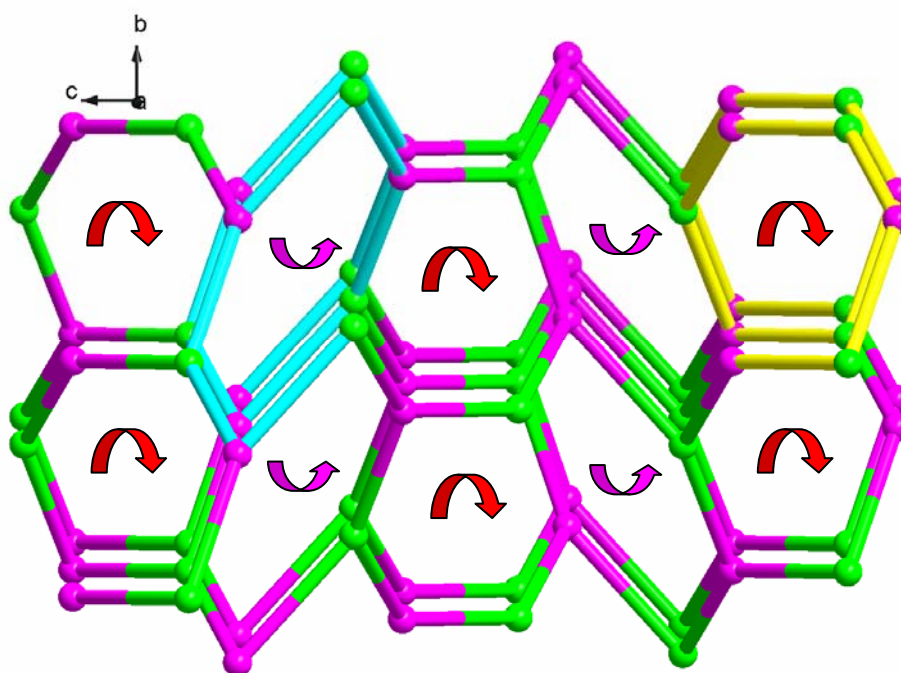

**Figure S4.** Schematic representation of the (10, 3)-b along the a axis (Pink balls: tib ligands; Green balls: Cd(II) atoms).

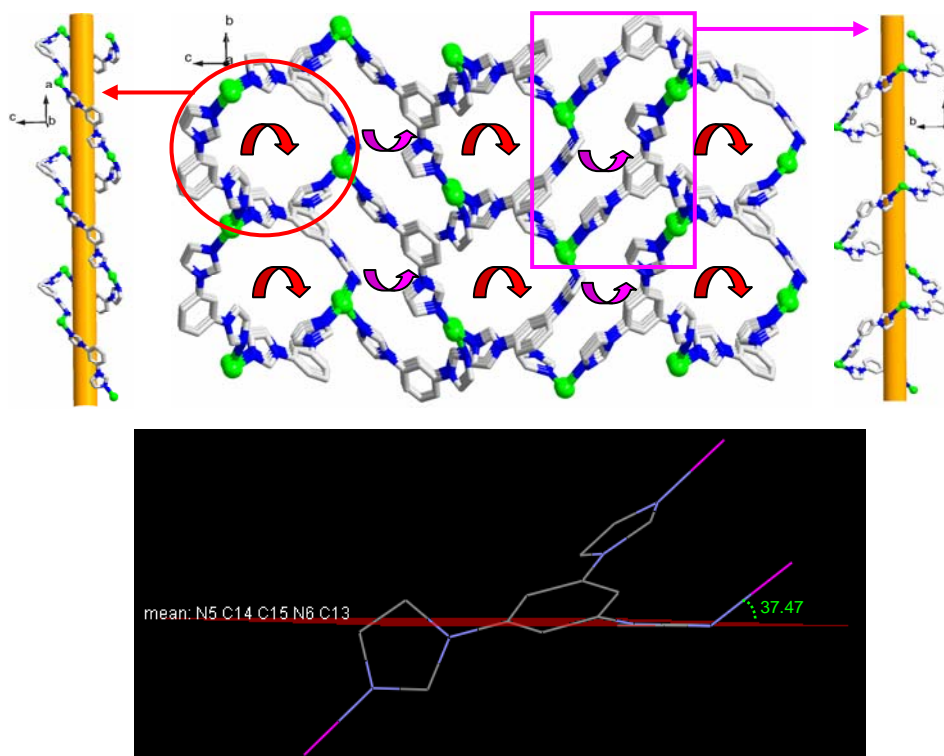

**Figure S5.** View of the 3D (10, 3)-b net constructed by tib and Cd(II) along *a* axis, in which the narrow are represent the direction of the helical chains (top). The distortion of tib is highlighted (bottom).

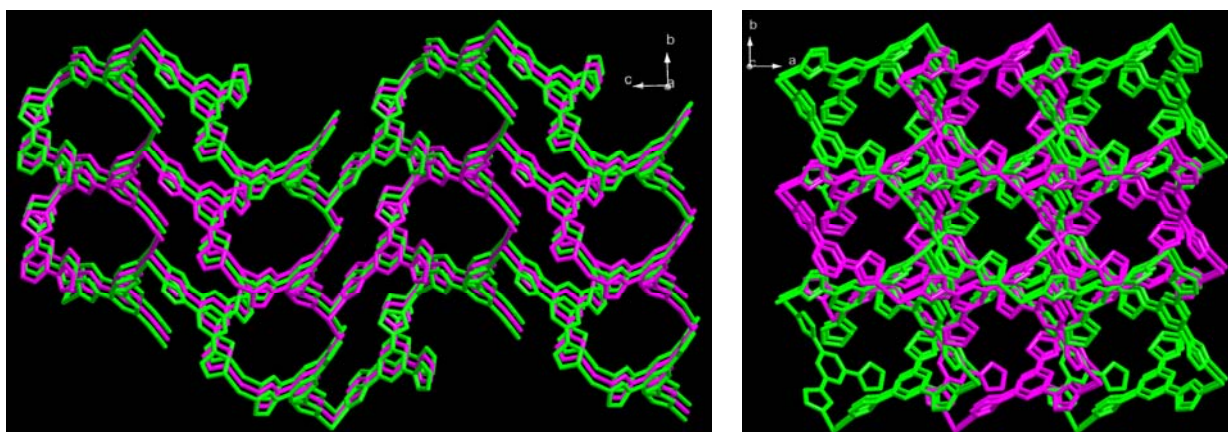

**Figure S6.** The 2-fold interpenetrating 3D structure of tib-Cd(II) viewed along *a* axis (left) and *c* axis (right), respectively.

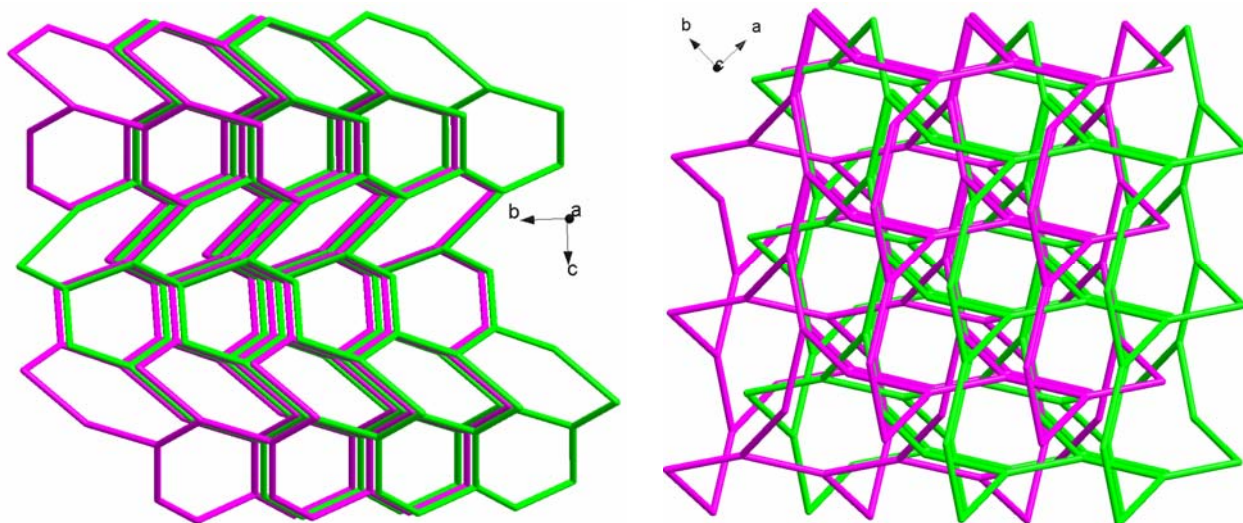

**Figure S7.** The 2-fold interpenetrating (10, 3)-b net viewed along  $a$  axis (left) and  $c$  axis (right), respectively.

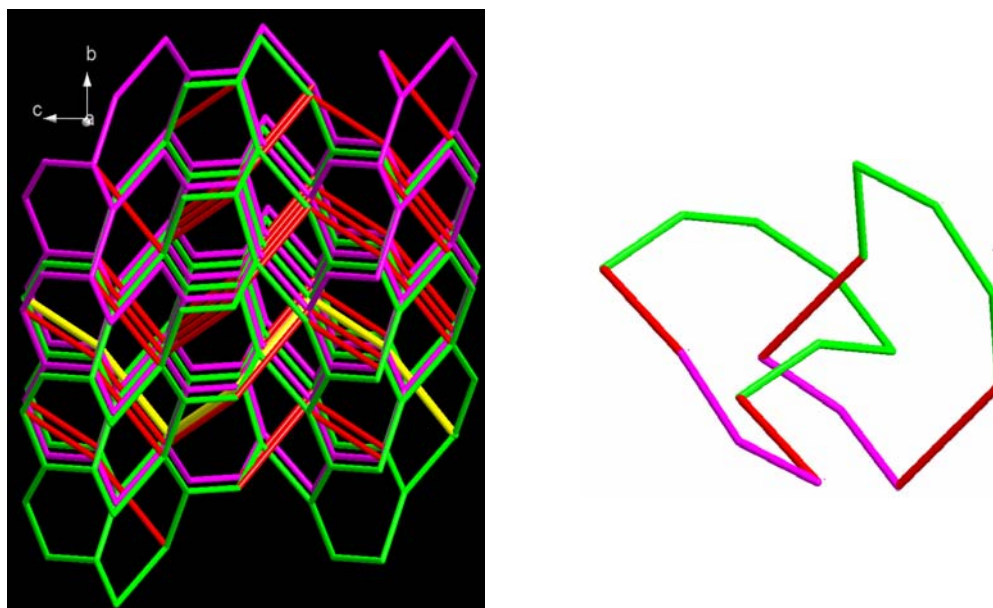

**Figure S8.** Left: the topological representation of the ultimate structure of **1L**, in which the pink and green lines are represented the 2-fold interpenetrating (10, 3)-b nets and the red and high-lighted yellow lines are for the left-handed helical chains. Right: the close-up view of self-penetrated rings in **1L**.



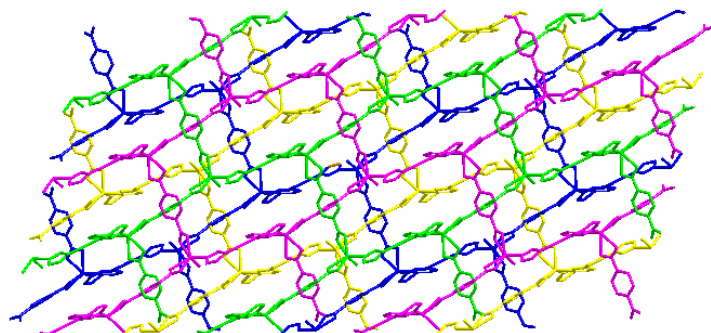

**Figure S12.** The 4-fold interpenetrating structure of **2**.

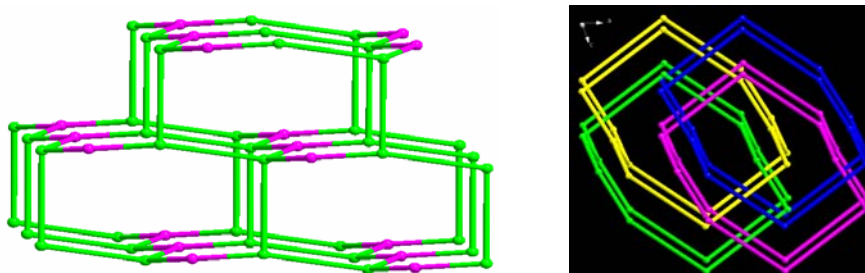

**Figure S13.** Left: the representation of the **tfa** topology of **2**, in which the pink balls are for the tib ligands and the green balls for the Cd(II) atoms. Right: the 4-fold interpenetrating **tfa** net of **2**.

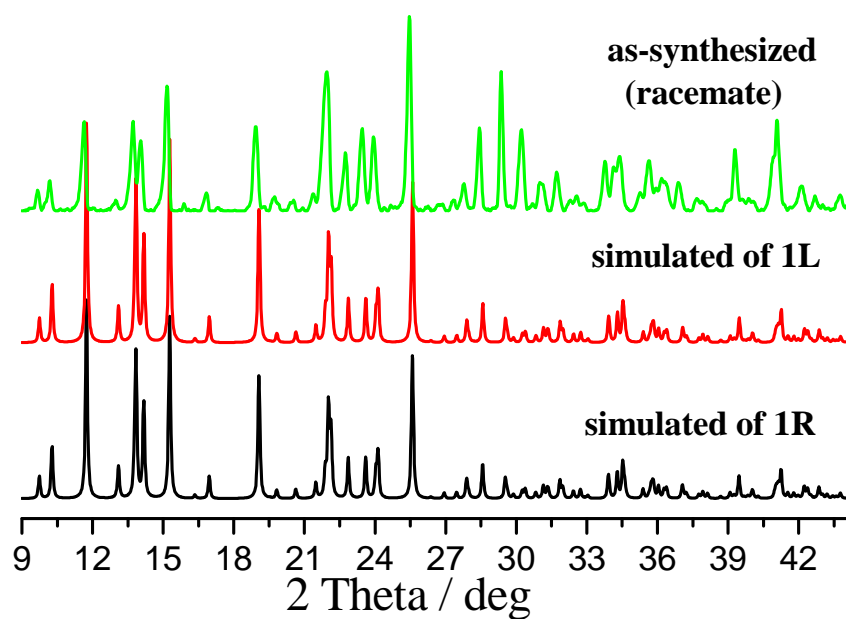

**Figure S14.** The as-synthesized and simulated XRD data of complex **1**.



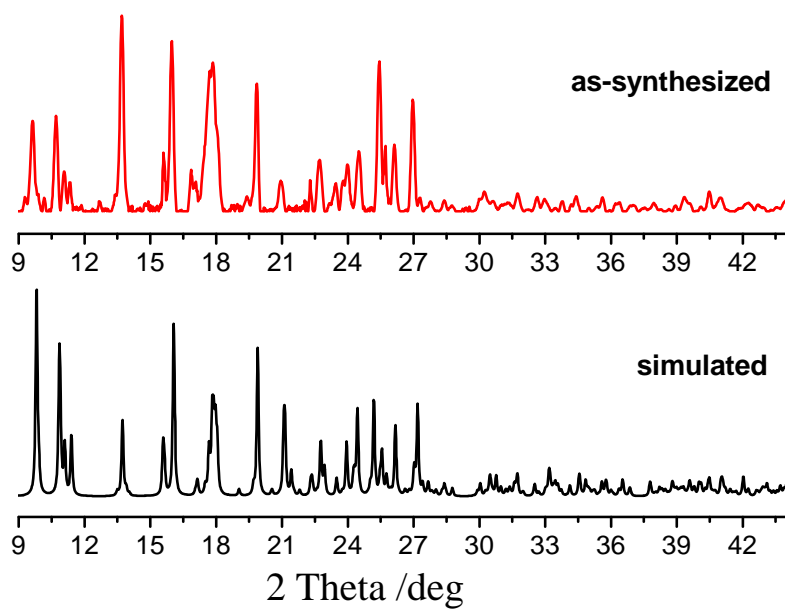

**Figure S15.** The as-synthesized and simulated XRD data of complex 2.

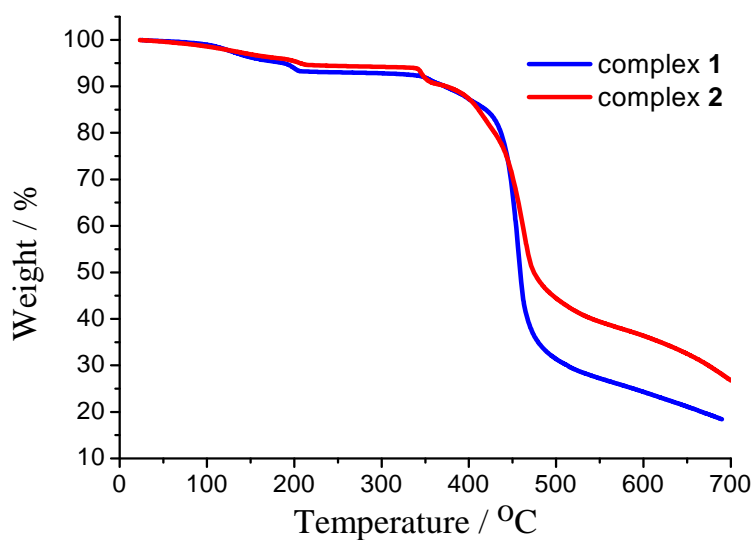

**Figure S16.** The TG curves of 1 and 2.
